# Supplementary material
Source: publisher figshare collection journal article supplement (https://tandf.figshare.com/articles/dataset/_/28390526)
Supplement: Supplementary file 2 [file 2]

**Supplementary table 1.** Ovid search strings used for the peer-reviewed literature search

| Search strings                                                                                                                                                                   |
|----------------------------------------------------------------------------------------------------------------------------------------------------------------------------------|
| (inequalit* or inequit* or equalit* or equit* or disparit* or divers*).ti.                                                                                                       |
| (geog* or race or ethnic* or occupation or gender or sex or relig* or educat* or socioeconomic or social capital or disab* or age or demog* or disadvantage or relationship).ti. |
| ((research or trial* or study or review or pathway or journey) and (health or clinical or medical or patient or patients)).ti.                                                   |

**Supplementary table 2.** Summary table for the gray literature articles identified in this search

| Gray literature source               | Title of article                                                                                 | Year of publication | Pharmaceutical companies involved | Measure of inequality                                                 | Key finding                                                                                                                                                                                                              |
|--------------------------------------|--------------------------------------------------------------------------------------------------|---------------------|-----------------------------------|-----------------------------------------------------------------------|--------------------------------------------------------------------------------------------------------------------------------------------------------------------------------------------------------------------------|
| Nature (via Google)                  | It is time to rethink how we advance health equity                                               | 2022                | Takeda                            | Geographical region, race/ethnicity, sex/gender, socioeconomic status | <ul style="list-style-type: none"> <li>• Collaboration between pharmaceutical companies and other private and public organizations is needed to tackle health inequalities.</li> </ul>                                   |
| Novartis (via Google)                | Levelling up health: a new approach to address health inequalities                               | 2021                | Novartis                          | Race/ethnicity, socioeconomic status                                  | <ul style="list-style-type: none"> <li>• Tackling health inequalities will require collaboration of pharmaceutical industry with public and private organizations, as well as working with local communities.</li> </ul> |
| Pfizer (via Google)                  | Pfizer's Institute of Translational Equitable Medicine addresses equity in health research       | 2021                | Pfizer                            | Race/ethnicity, sex/gender                                            | <ul style="list-style-type: none"> <li>• Company objective to understand the drivers of health inequities and how scientific discoveries can meet the needs of underrepresented and minority patients.</li> </ul>        |
| PharmaNews Intelligence (via Google) | Improving health equity across the pharmaceutical industry                                       | 2021                | Bristol Myers Squibb              | Race/ethnicity                                                        | <ul style="list-style-type: none"> <li>• Implementation of initiatives and company objectives aimed at improving health inequalities and clinical trial diversity.</li> </ul>                                            |
| Pharmaphorum                         | Moderna targets 15 pathogens in 'global public health strategy'                                  | 2022                | Moderna                           | Geographic region                                                     | <ul style="list-style-type: none"> <li>• Moderna to begin clinical trials of mRNA vaccines for infectious diseases that cause greatest public health risk globally.</li> </ul>                                           |
| PharmaVoice                          | Addressing diversity in clinical trials                                                          | 2018                | Eli Lilly, Sanofi                 | Race/ethnicity                                                        | <ul style="list-style-type: none"> <li>• Outlines several initiatives aimed at improving clinical trial diversity.</li> </ul>                                                                                            |
| PharmaVoice                          | Bringing health equity to all patients                                                           | 2021                | Boehringer Ingelheim, Janssen     | Race/ethnicity                                                        | <ul style="list-style-type: none"> <li>• Opinion article highlighting importance of addressing health inequalities.</li> </ul>                                                                                           |
| PharmaVoice                          | Ferring Pharmaceuticals president discusses the need for more funding in women's health research | 2022                | Ferring Pharmaceuticals           | Geographic region, sex/gender                                         | <ul style="list-style-type: none"> <li>• Company are funding research proposals that address unmet need in reproductive medicine and maternal health in several countries around the world.</li> </ul>                   |
| PharmaVoice                          | The changing face of patient recruitment                                                         | 2021                | Sanofi, Pfizer                    | Race/ethnicity                                                        | <ul style="list-style-type: none"> <li>• Discusses pharmaceutical company commitments to ensure diversity in their clinical trials and the use of digital</li> </ul>                                                     |

|             |                                                                                                   |      |          |                |                                                                                                            |
|-------------|---------------------------------------------------------------------------------------------------|------|----------|----------------|------------------------------------------------------------------------------------------------------------|
|             |                                                                                                   |      |          |                | technology to improve participation in clinical trials.                                                    |
| PharmaVoice | The Novartis U.S. Foundation's president on the 'magical piece' of its 10-year health equity plan | 2022 | Novartis | Race/ethnicity | <ul style="list-style-type: none"><li>• Company initiatives to improve clinical trial diversity.</li></ul> |
